# Supplementary material for: The Value of Routine Biopsy during Percutaneous Kyphoplasty for Vertebral Compression Fractures
Source: PLoS One. 2014 Dec 19;9(12):e115417. doi: 10.1371/journal.pone.0115417 (PMC4272288; doi:10.1371/journal.pone.0115417)
Supplement: S2 Excel — The original data of the biopsy group in English. (XLSX) [file pone.0115417.s002.xlsx]

## Sheet: Main
Biopsy	PatientsNumber	GenderMale1	Age	VertebralNumber	NumberOfVertebraOperated	BloodLossPerPatient	BloodLossPerVertebra	OperationTimePerPatient	OperationTimePerVertebra	CementLeakage	PreVAS	PostVAS	CancerHistory	CancerHistory	Biopsy Result
	Mean	31	68.7087		157		4.66815		41.051	12	7.35922	2.39806	3
	SD		9.8912				2.09217		6.58845		0.861535	0.867041
1	1	0	62	1	1	4.6	4.6	40	40	0	6	2	0
1	2	0	63	2	1	5.8	5.8	48	48	0	7	2	0
1	3	0	75	3	1	3.2	3.2	45	45	0	6	2	0
1	4	0	65	4	1	5.6	5.6	50	50	1	6	2	0
1	5	0	51	5	1	4.8	4.8	45	45	0	9	2	0
1	6	1	85	6	1	3	3	45	45	0	6	1	0
1	7	1	81	7	1	8	8	60	60	0	7	2	0
1	8	0	81	8	1	4.9	4.9	40	40	0	7	3	0
1	9	0	79	9	1	2.9	2.9	55	55	0	7	6	0
1	10	0	56	10	1	3.6	3.6	50	50	0	6	2	0
1	11	0	67	11	1	6.5	6.5	45	45	1	6	1	0
1	12	0	57	12	1	5.8	5.8	45	45	0	8	2	0
1	13	1	56	13	1	7.4	7.4	47	47	0	8	1	0
1	14	0	61	14	1	2	2	40	40	1	6	3	0
1	15	0	87	15	1	9.7	9.7	50	50	0	8	3	0
1	16	1	61	16	1	3.1	3.1	45	45	0	6	3	0
1	17	0	74	17	1	2.7	2.7	40	40	0	6	2	0
1	18	0	64	18	1	10	10	45	45	1	7	3	0
1	19	1	55	19	1	15	15	40	40	0	8	3	0
1	20	0	89	20	1	2	2	45	45	0	8	4	1	LungCa
1	21	0	72	21	1	3.2	3.2	52	52	0	8	1	0
1	22	1	67	22	1	3.2	3.2	40	40	0	8	2	0
1	23	0	78	23	1	4.1	4.1	45	45	0	8	3	0
1	24	0	60	24	1	3.5	3.5	50	50	1	8	3	0
1	25	0	76	25	1	4.4	4.4	55	55	0	8	3	0
1	26	0	57	26	1	2.5	2.5	40	40	0	7	2	0
1	27	0	47	27	1	3	3	42	42	0	6	3	0		multiple myeloma
1	28	0	73	28	1	2.8	2.8	40	40	0	8	3	0		chronic osteomyelitis
1	29	0	50	29	1	5.1	5.1	40	40	0	7	1	0
1	30	0	65	30	1	6.7	6.7	45	45	0	9	3	0
1	31	0	56	31	1	5.2	5.2	50	50	0	7	2	0		Paget's
1	32	0	62	32	1	4.9	4.9	43	43	0	8	2	0
1	33	0	79	33	1	4.3	4.3	45	45	0	6	3	0
1	34	1	82	34	1	9	9	40	40	0	7	2	1	RenalCa
1	35	0	85	35	1	4.4	4.4	50	50	0	8	3	0
1	36	0	74	36	1	13	13	45	45	0	6	2	0
1	37	0	77	37	1	4.2	4.2	40	40	0	7	4	0
1	38	0	68	38	1	3	3	40	40	0	7	2	0
1	39	0	81	39	1	12	12	45	45	0	8	3	1	LungCa
1	40	0	74	40	1	3.1	3.1	40	40		6	1	0
1	41	0	74	41	1	2	2	45	45	0	7	2	0
1	42	0	60	42	1	6.3	6.3	51	51	0	7	2	0
1	43	0	55	43	1	3.1	3.1	60	60	0	6	2	0
1	44	1	80	44	1	4.1	4.1	55	55	0	8	3	0
1	45	0	78	45	1	11	11	40	40	0	7	2	0
1	46	0	61	46	1	3	3	55	55	0	6	2	0
1	47	0	77	47	1	7.8	7.8	53	53	0	7	3	0
1	48	0	66	48	1	6.3	6.3	45	45	0	6	2	0
1	49	1	68	49	1	2.5	2.5	53	53	0	9	3	0
1	50	0	75	50	1	3	3	55	55	0	8	3	0
1	51	0	66	51	1	6.8	6.8	50	50	0	6	2	0
1	52	1	82	52	1	3.9	3.9	47	47	0	7	1	0
1	53	0	68	53	1	7.4	7.4	45	45	0	8	2	0
1	54	0	70	54	1	10.5	10.5	60	60	1	6	3	0
1	55	1	83	55	1	2.9	2.9	39	39	0	7	2	0
1	56	0	73	56	1	3.5	3.5	47	47	0	7	1	0
1	57	1	55	57	1	4.8	4.8	60	60		7	2	0
1	58	0	79	58	1	7.1	7.1	45	45	0	7	2	0
1	59	1	60	59	1	8	8	52	52	0	8	3	0
1	60	0	76	60	2	7.2	3.6	76	38	0	9	2	0
1				61			3.6		38	0
1	61	0	73	62	2	7.6	3.8	70	35	0	8	4	0
1				63			3.8		35	0
1	62	0	71	64	2	7.2	3.6	80	40	1	8	3	0
1				65			3.6		40	0
1	63	0	84	66	2	8.4	4.2	70	35	0	7	2	0
1				67			4.2		35	0
1	64	0	53	68	2	12	6	76	38	0	8	2	0
1				69			6		38	0
1	65	0	68	70	2	8.6	4.3	86	43	0	7	3	0
1				71			4.3		43	0
1	66	0	78	72	2	7	3.5	82	41	1	8	2	0
1				73			3.5		41	0
1	67	1	52	74	2	7.6	3.8	80	40	0	7	1	0
1				75			3.8		40	0
1	68	0	77	76	2	9.2	4.6	70	35	1	8	3	0
1				77			4.6		35	0
1	69	1	62	78	2	7.8	3.9	82	41	0	7	1	0
1				79			3.9		41	0
1	70	0	79	80	2	5.4	2.7	74	37	0	8	3	0
1				81			2.7		37	0
1	71	1	59	82	2	13	6.5	90	45	0	8	2	0
1				83			6.5		45	0
1	72	0	58	84	2	5.7	2.9	84	42	0	7	2	0
1				85			2.9		42	0
1	73	1	73	86	2	8	4	80	40	1	7	3	0
1				87			4		40	0
1	74	1	60	88	2	9.1	4.6	86	43	0	8	3	0
1				89			4.6		43	0
1	75	0	80	90	2	6.2	3.1	80	40	0	9	4	0
1				91			3.1		40	0
1	76	1	67	92	2	6	3	78	39	0	7	2	0
1				93			3		39	0
1	77	1	64	94	2	7.2	3.6	80	40	0	7	1	0
1				95			3.6		40	0
1	78	1	75	96	2	9	4.5	84	42	0	8	1	0
1				97			4.5		42	0
1	79	0	85	98	2	15	7.5	76	38	0	8	3	0
1				99			7.5		38	0
1	80	1	61	100	2	11.8	5.9	84	42	0	7	2	0
1				101			5.9		42	0
1	81	0	69	102	2	5	2.5	90	45	0	8	1	0
1				103			2.5		45	0
1	82	0	72	104	2	12.2	6.1	70	35	0	9	3	0
1				105			6.1		35	0
1	83	1	77	106	2	11.6	5.8	80	40	0	7	2	0
1				107			5.8		40	0
1	84	0	81	108	2	5	2.5	70	35	0	8	3	0
1				109			2.5		35	0
1	85	1	62	110	2	10.8	5.4	80	40	0	7	2	0
1				111			5.4		40	0
1	86	0	59	112	2	9.2	4.6	84	42	0	7	2	0
1				113			4.6		42	0
1	87	1	69	114	2	6	3	74	37	0	7	2	0
1				115			3		37	0
1	88	1	54	116	2	13	6.5	80	40	0	8	3	0
1				117			6.5		40	0
1	89	0	55	118	2	7.4	3.7	70	35	1	8	2	0
1				119			3.7		35	0
1	90	1	56	120	2	11.8	5.9	82	41	0	8	1	0
1				121			5.9		41	0
1	91	0	74	122	2	11.3	5.7	70	35	0	7	3	0
1				123			5.7		35	0
1	92	1	61	124	2	6.4	3.2	82	41	0	7	3	0
1				125			3.2		41	0
1	93	0	74	126	2	5	2.5	76	38	1	8	3	0
1				127			2.5		38	0
1	94	0	77	128	3	10	3.3	90	30	0	7	2	0
1				129			3.3		30	0
1				130			3.3		30	0
1	95	0	63	131	3	12.6	4.2	105	35	0	8	4	0
1				132			4.2		35	0
1				133			4.2		35	0
1	96	0	62	134	3	7.5	2.5	90	30	0	9	3	0
1				135			2.5		30	0
1				136			2.5		30	0
1	97	0	67	137	3	12	4	102	34	0	8	3	0
1				138			4		34	0
1				139			4		34	0
1	98	0	76	140	3	14.5	4.8	99	33	0	9	4	0
1				141			4.8		33	0
1				142			4.8		33	0
1	99	1	78	143	3	13	4.3	105	35	0	8	3	0
1				144			4.3		35	0
1				145			4.3		35	0
1	100	1	53	146	3	11.7	3.9	99	33	0	7	3	0
1				147			3.9		33	0
1				148			3.9		33	0
1	101	0	63	149	3	12.3	4.1	90	30	0	8	2	0		multiple myeloma
1				150			4.1		30	0
1				151			4.1		30	0
1	102	0	68	152	3	14	4.7	105	35	0	8	2	0
1				153			4.7		35	0
1				154			4.7		35	0
1	103	1	70	155	3	15.4	5.1	120	40	0	7	3	0
1				156			5.1		40	0
1				157			5.1		40	0
	Total	31				732.9	732.9	6445	6445

## Sheet: Vertebral Location
Location	Number
T4	1
T5	1
T6	3
T7	7
T8	5
T9	8
T10	6
T11	15
T12	28
L1	39
L2	19
L3	13
L4	10
L5	2
Total	157

## Sheet: VAS
Pre VAS	Post VAS	VAS Change
7	3	4
6	2	4
9	3	6
7	2	5
8	3	5
7	6	1
6	2	4
7	1	6
7	3	4
8	2	6
7	3	4
7	3	4
7	3	4
7	2	5
7	2	5
8	2	6
7	3	4
7	2	5
8	3	5
6	2	4
7	2	5
7	2	5
8	3	5
7	1	6
9	3	6
7	2	5
8	2	6
9	3	6
7	2	5
7	1	6
8	2	6
7	3	4
8	3	5
6	2	4
7	2	5
6	2	4
7	2	5
7	1	6
6	3	3
8	3	5
8	3	5
6	1	5
7	2	5
7	1	6
6	1	5
6	3	3
8	3	5
7	2	5
6	2	4
7	4	3
7	2	5
8	3	5
8	2	6
8	4	4
8	2	6
7	3	4
7	1	6
8	4	4
7	2	5
7	2	5
8	2	6
7	1	6
7	2	5
9	2	7
8	2	6
8	3	5
7	2	5
7	1	6
8	3	5
7	2	5
8	3	5
9	2	7
8	3	5
7	2	5
7	3	4
9	3	6
7	3	4
8	2	6
7	4	3
8	3	5
8	2	6
7	1	6
8	1	7
8	2	6
7	1	6
9	4	5
7	3	4
9	3	6
8	3	5
8	3	5
8	2	6
8	2	6
8	3	5
6	2	4
7	2	5
6	2	4
6	2	4
9	2	7
6	1	5
7	2	5
7	3	4
7	6	1
6	2	4
6	1	5
8	2	6
8	1	7
6	3	3
8	3	5
6	3	3
6	2	4
7	3	4
8	3	5
8	4	4
8	1	7
8	2	6
8	3	5
8	3	5
8	3	5
7	2	5
6	3	3
8	3	5
7	1	6
9	3	6
7	2	5
8	2	6
6	3	3
7	2	5
8	3	5
6	2	4
7	4	3
7	2	5
8	3	5
6	1	5
7	2	5
7	2	5
6	2	4
8	3	5
7	2	5
6	2	4
7	3	4
6	2	4
9	3	6
8	3	5
6	2	4
7	1	6
8	2	6
6	3	3
7	2	5
7	1	6
7	2	5
7	2	5
8	3	5
9	2	7
8	4	4
8	3	5
7	2	5
8	2	6
7	3	4
8	2	6
7	1	6
8	3	5
7	1	6
8	3	5
8	2	6
7	2	5
7	3	4
8	3	5
9	4	5
7	2	5
7	1	6
8	1	7
8	3	5
7	2	5
8	1	7
9	3	6
7	2	5
8	3	5
7	2	5
7	2	5
7	2	5
8	3	5
8	2	6
8	1	7
7	3	4
7	3	4
8	3	5
7	2	5
8	4	4
9	3	6
8	3	5
9	4	5
8	3	5
7	3	4
8	2	6
8	2	6
7	3	4
